# Supplementary material for: miR-20a regulates expression of the iron exporter ferroportin in lung cancer
Source: PubMed Central journal article supplement (PMC4803811; doi:10.1007/s00109-015-1362-3), 2015-11-12
Supplement: 109_2015_1362_MOESM1_ESM.pdf [file 109_2015_1362_MOESM1_ESM.pdf]

# **Electronic Supplementary Material**

**miR-20a regulates expression of the iron exporter ferroportin in lung cancer**

Kamesh R. Babu and Martina U. Muckenthaler

**Journal of Molecular Medicine 2015**

**SUPPLEMENTARY MATERIAL:**

| <b>Name</b>   | <b>5' Sequence 3'</b>     |
|---------------|---------------------------|
| hs-ACTB_F     | TTCCGCTGCCCTGAGGCACTCT    |
| hs-ACTB_R     | TCTGCTGGAAGGTGGACAGCGA    |
| hs-pre-ACTB_F | CTATTCTCGCAGCTCACCATG     |
| hs-pre-ACTB_R | CAGCTCCCCTACCTGGTG        |
| hs-FPN_F      | TGCTGTTTGCAGGCGTCATT      |
| hs-FPN_R      | TTGCAGCAACTGTGTACAGTT     |
| hs-pre-FPN_F  | TACCCATTGGGAAGGGGAAT      |
| hs-pre-FPN_R  | CCAGGGGTTTTGGCTCAGTA      |
| hs-HIF1A_F    | CCCCAGATTCAGGATCAGACA     |
| hs-HIF1A_R    | GGGACTATTAGGCTCAGGTGAACTT |
| hs-RPL19_F    | TCGCCTCTAGTGTCTCCG        |
| hs-RPL19_R    | GCGGGCCAAGGTGTTTTTC       |
| hs-RNU6       | GTGCTCGCTTCGGCAGCACATATAC |
| hs-miR-20a-5p | TAAAGTGCTTATAGTGCAGGTAGG  |
| hs-miR-21-5p  | TAGCTTATCAGACTGATGTTGAGG  |

**Table S1: Primers used for qPCR analysis of mRNA and miRNA transcripts**

| <b>Name</b> | <b>5' Sequence 3'</b>                        |
|-------------|----------------------------------------------|
| h-FPN-F     | AAAGCTAGCATGACCAGGGCGGGAG                    |
| h-FPN-R     | AAACTCGAGAACAACAGATGTATTTGCTTGATT            |
| Flag_F      | [Phos]AATTCTAGACTACAAGGACGACGATGACAAGTGAGC   |
| Flag_R      | [Phos]GGCCGCTCACTTGTTCATCGTCGTCCTTGCTAGTCTAG |

**Table S2: Primers used to generate FPN expression constructs.** Sequences with 5' phosphate represented as [Phos] were annealed using oligo annealing buffer followed by direct ligating into the vector.

| <b>Name</b>        | <b>5' Sequence 3'</b>                                                                                  |
|--------------------|--------------------------------------------------------------------------------------------------------|
| hs-FPN_F           | GAGAGCTCGGAAGGAAAATCAAGCAAATACA                                                                        |
| hs-FPN_R           | GAGCTAGCTTGGGGAACAGAATTCAGGA                                                                           |
| hs-HIF1A_F         | GAGAGCTCACTCAGAGCTTTGGATCAAGTT                                                                         |
| hs-HIF1A_R         | GAGCTAGCGCCTGGTCCACAGAAGATGT                                                                           |
| hs-RPL19_F         | [Phos]CAACCTCCCACCTTTGTCTGTACATACTGGCCTCTGTGATTACA<br>TAGATCAGCCATTAATAAATAAACAAGCCTTAATCTGCG          |
| hs-RPL19_R         | [Phos]CTAGCGCAGATTAAGGCTTGTTTTATTTAATGGCTGATCTAT<br>GTAATCACAGAGGCCAGTATGTACAGACAAAGTGGGAGGTTGAGC<br>T |
| hs-miR-20a-5p(+)_F | [Phos]CCTACCTGCACTATAAGCACTTTAG                                                                        |
| hs-miR-20a-5p(+)_R | [Phos]CTAGCTAAAGTGCTTATAGTGCAGGTAGGAGCT                                                                |
| hs-miR-20a-5p(-)_F | [Phos]CTAAAGTGCTTATAGTGCAGGTAGG                                                                        |
| hs-miR-20a-5p(-)_R | [Phos]CTAGCCTACCTGCACTATAAGCACTTTAGAGCT                                                                |

**Table S3: Primers used for the amplification of 3'-UTR sequences.** Sequences with 5' phosphate represented as [Phos] were annealed using oligo annealing buffer followed by direct ligating into the vector.

| <b>Name</b>    | <b>5' Sequence 3'</b>                                                      |
|----------------|----------------------------------------------------------------------------|
| hs-FPN-MT1_F   | TCAGTTTGCAACATGTCTGTACCAAGATGGTAGAATGCCTTAACCG<br>TTTATA                   |
| hs-FPN-MT1_R   | TATAAACGGTTAAGGCATTCTACCATCTTGGTACAGACATGTTGCA<br>AACTGA                   |
| hs-FPN-MT2_F   | GATGGTAGAATGCCTTAACCGTTTATATGCAGAATCATGGAGACTG<br>CAATAC                   |
| hs-FPN-MT2_R   | GTATTGCAGTCTCCATGATTCTGCATATAAACGGTTAAGGCATTCT<br>ACCATC                   |
| hs-FPN-MT3_F   | GGAGACTGCAATACGTTGCTATGAGCAGAATCTTTATCCTTGGAGT<br>TTAAT                    |
| hs-FPN-MT3_R   | ATTAAACTCCAAGGATAAAGATTCTGCTCATAGCAACGTATTGCAG<br>TCTCC                    |
| hs-HIF1A-MT1_F | TGGTATTTAAACCATTGCATTGCAGTAGCATCAGAATAAAAAATGC<br>ACCTTTTTATTTATTTATTTTTGG |
| hs-HIF1A-MT1_R | CCAAAAATAAATAAATAAAAAGGTGCATTTTTTATTCTGATGCTAC<br>TGCAATGCAATGGTTTAAATACCA |
| hs-HIF1A-MT2_F | TACTGCTGGCAAAGCATTATTATTTATGTATTCTGTGAAAAAAAAG<br>GTGTAAAAATTTTTCAACTGCCT  |
| hs-HIF1A-MT2_R | AGGCAGTTGAAAAATTTTTACACCTTTTTTTTCACAGAATACATAA<br>ATAATAATGCTTTGCCAGCAGTA  |
| hs-HIF1A-MT3_F | TTTTCTTTTGAGCTGGCATTCTGACTATAGAAACATCAGATGATTTC<br>TCTGAATTG               |
| hs-HIF1A-MT3_R | CAATTCAGAGAAATCATCTGATGTTTCTATAGTCAGAATGCCAGCT<br>CAAAGAAAA                |
| hs-HIF1A-MT4_F | AGTATGTTAATTTGCTCAAAATACAATGTTTGATTTTATGCAGAAT<br>GTCGCTATTAACATCCTTTTTTT  |
| hs-HIF1A-MT4_R | AAAAAAAGGATGTTAATAGCGACATTCTGCATAAAATCAAACATT<br>GTATTTTGAGCAAATTAACATACT  |

**Table S4: Primers used to mutagenize the miR-20a-5p seed sequences**

## Figure S1

A

### Predicted site 1

HIF1A-WT 5'-(235)GCAUUGCAGUAGCAU**CAUUUUA**(257)-3'  
 miR-20a-5p 3'-GAUGGACGUGAUUUC**GUGAAA**-5'  
 HIF1A-MUT 5'-(235)GCAUUGCAGUAGCAU**CAgaaUA**(257)-3'

### Predicted site 2

HIF1A-WT 5'-(399)UUAACACCUUUUUUUC**CAUUUUA**(417)-3'  
 miR-20a-5p 3'-GAUGGACGUGAUUUC**GUGAAA**-5'  
 HIF1A-MUT 5'-(399)UUAACACCUUUUUUUC**CAgaaUA**(417)-3'

### Predicted site 3

HIF1A-WT 5'-(732)CUGAUGUUUCUAUAG**CACUUUUG**(754)-3'  
 miR-20a-5p 3'-GAUGGACGUGAUUUC**GUGAAA**-5'  
 HIF1A-MUT 5'-(732)CUGAUGUUUCUAUAG**CAgaaUG**(754)-3'

### Predicted site 4

HIF1A-WT 5'-(943)AAUGUUUGAUUUU**UAGCACUUUG**(965)-3'  
 miR-20a-5p 3'-GAUGGACGUGAUUUC**GUGAAA**-5'  
 HIF1A-MUT 5'-(943)AAUGUUUGAUUUU**UAGCAgaaUG**(965)-3'

B

### Predicted site 1

FPN-WT 5'-(1093)GUCUGUACCUUGAUG**GUACUUUG**(1115)-3'  
 miR-20a-5p 3'-GAUGGACGUGAUUUC**GUGAAA**-5'  
 FPN-MUT 5'-(1093)GUCUGUACCUUGAUG**GUAgaaUG**(1115)-3'

### Predicted site 2

FPN-WT 5'-(1119)UAACCGUUUUAU**UGCACUUUC**(1139)-3'  
 miR-20a-5p 3'-GAUGGACGUGAUUUC**GUGAAA**-5'  
 FPN-MUT 5'-(1119)UAACCGUUUUAU**UGCgaaUC**(1139)-3'

### Predicted site 3

FPN-WT 5'-(1152)AUACGUUGCUAUG**AGCACUUUC**(1173)-3'  
 miR-20a-5p 3'-GAUGGACGUGAUUUC**GUGAAA**-5'  
 FPN-MUT 5'-(1152)AUACGUUGCUAUG**AGCAgaaUC**(1173)-3'

Figure S1. Putative miR-20a binding sites in the 3'UTRs of human (A) HIF1A and (B) FPN. The nucleotides that are mutated in the wild type 3'UTRs are indicated in bold and lower case.

Figure S2

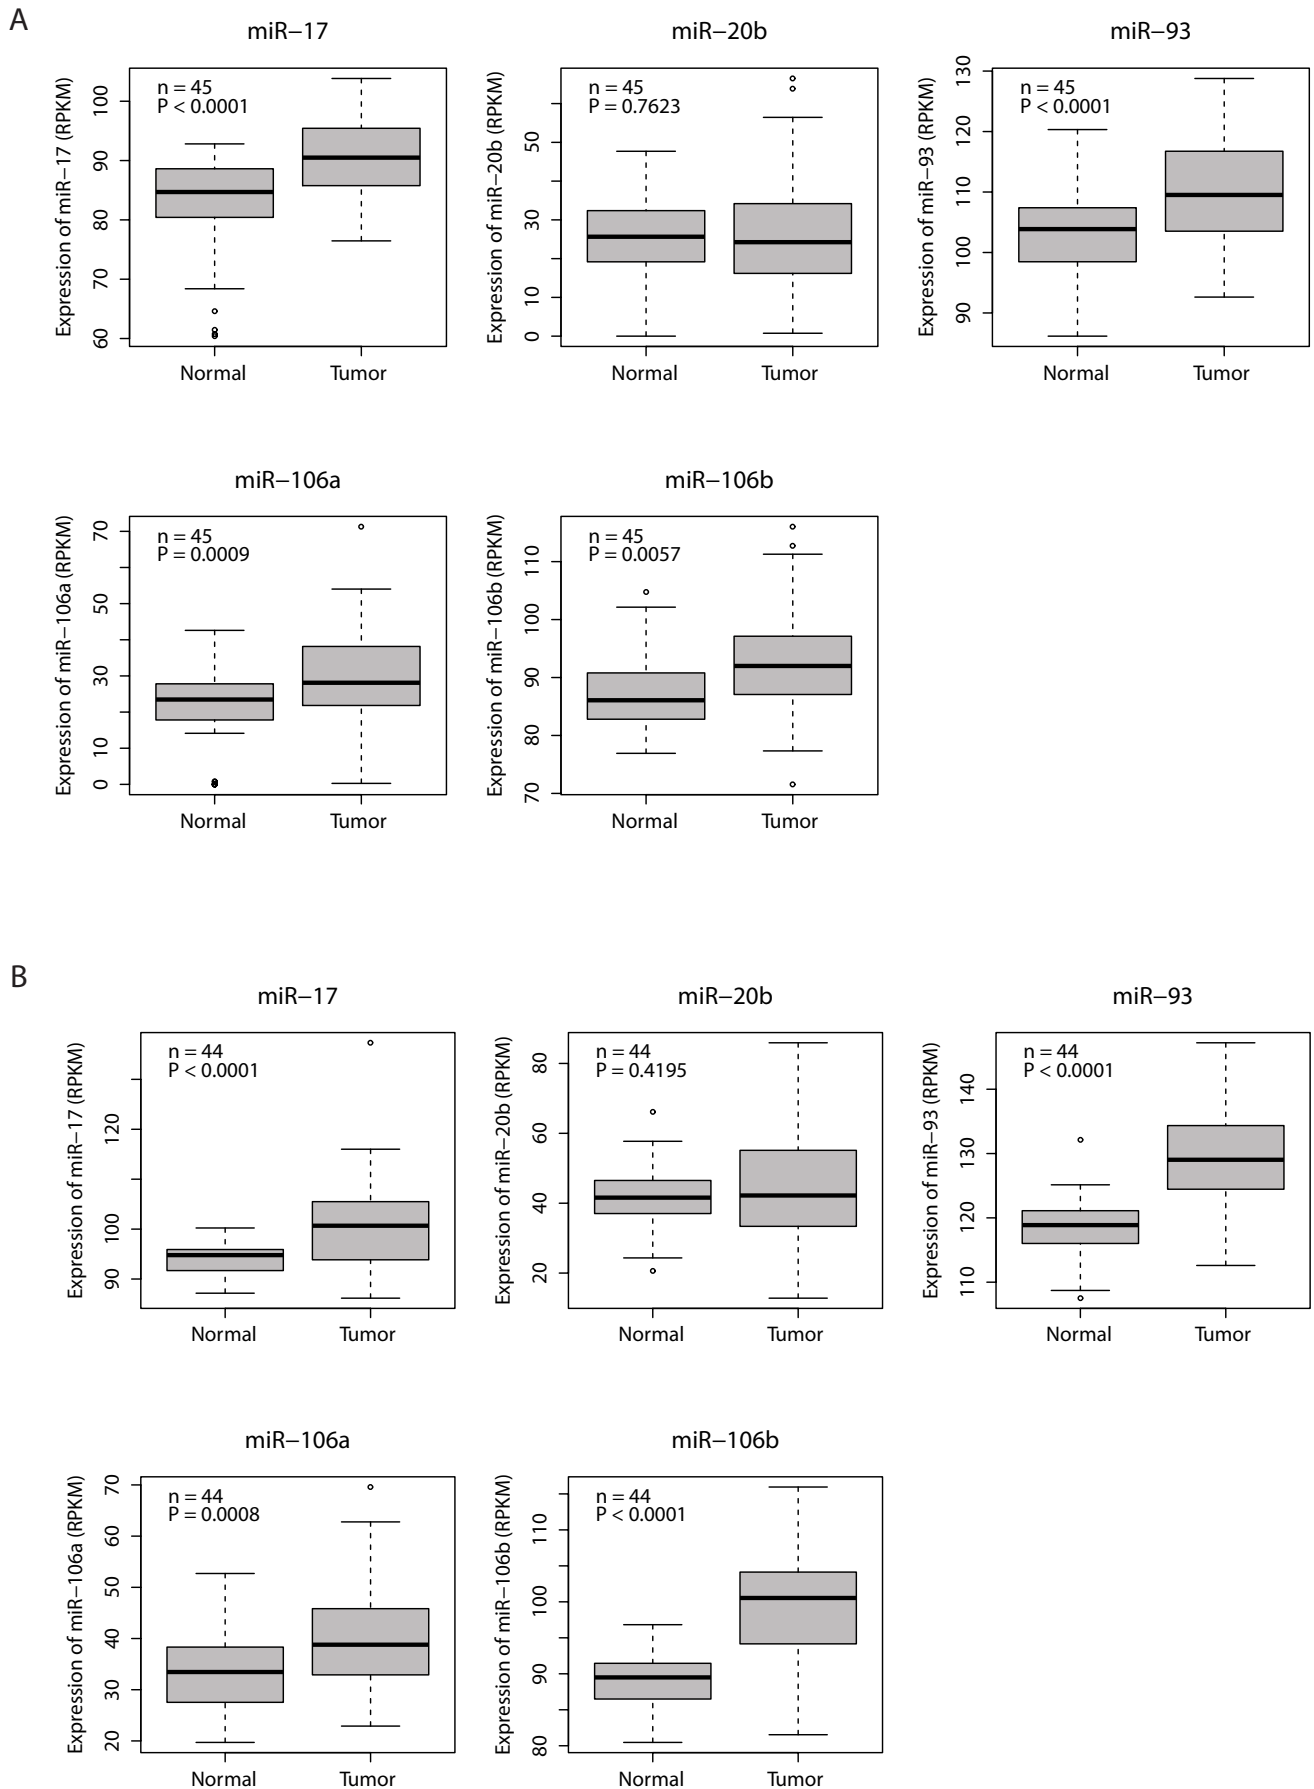

Figure S2. Boxplots indicating expression levels of the indicated member of the miR-17 seed family in the tumor and matching healthy tissue within TCGA datasets of (A) lung adenocarcinoma (LUAD) and (B) lung squamous cell carcinoma (LUSC) patients. 2-tailed Student's t test was used to calculate statistical significance.

Figure S3

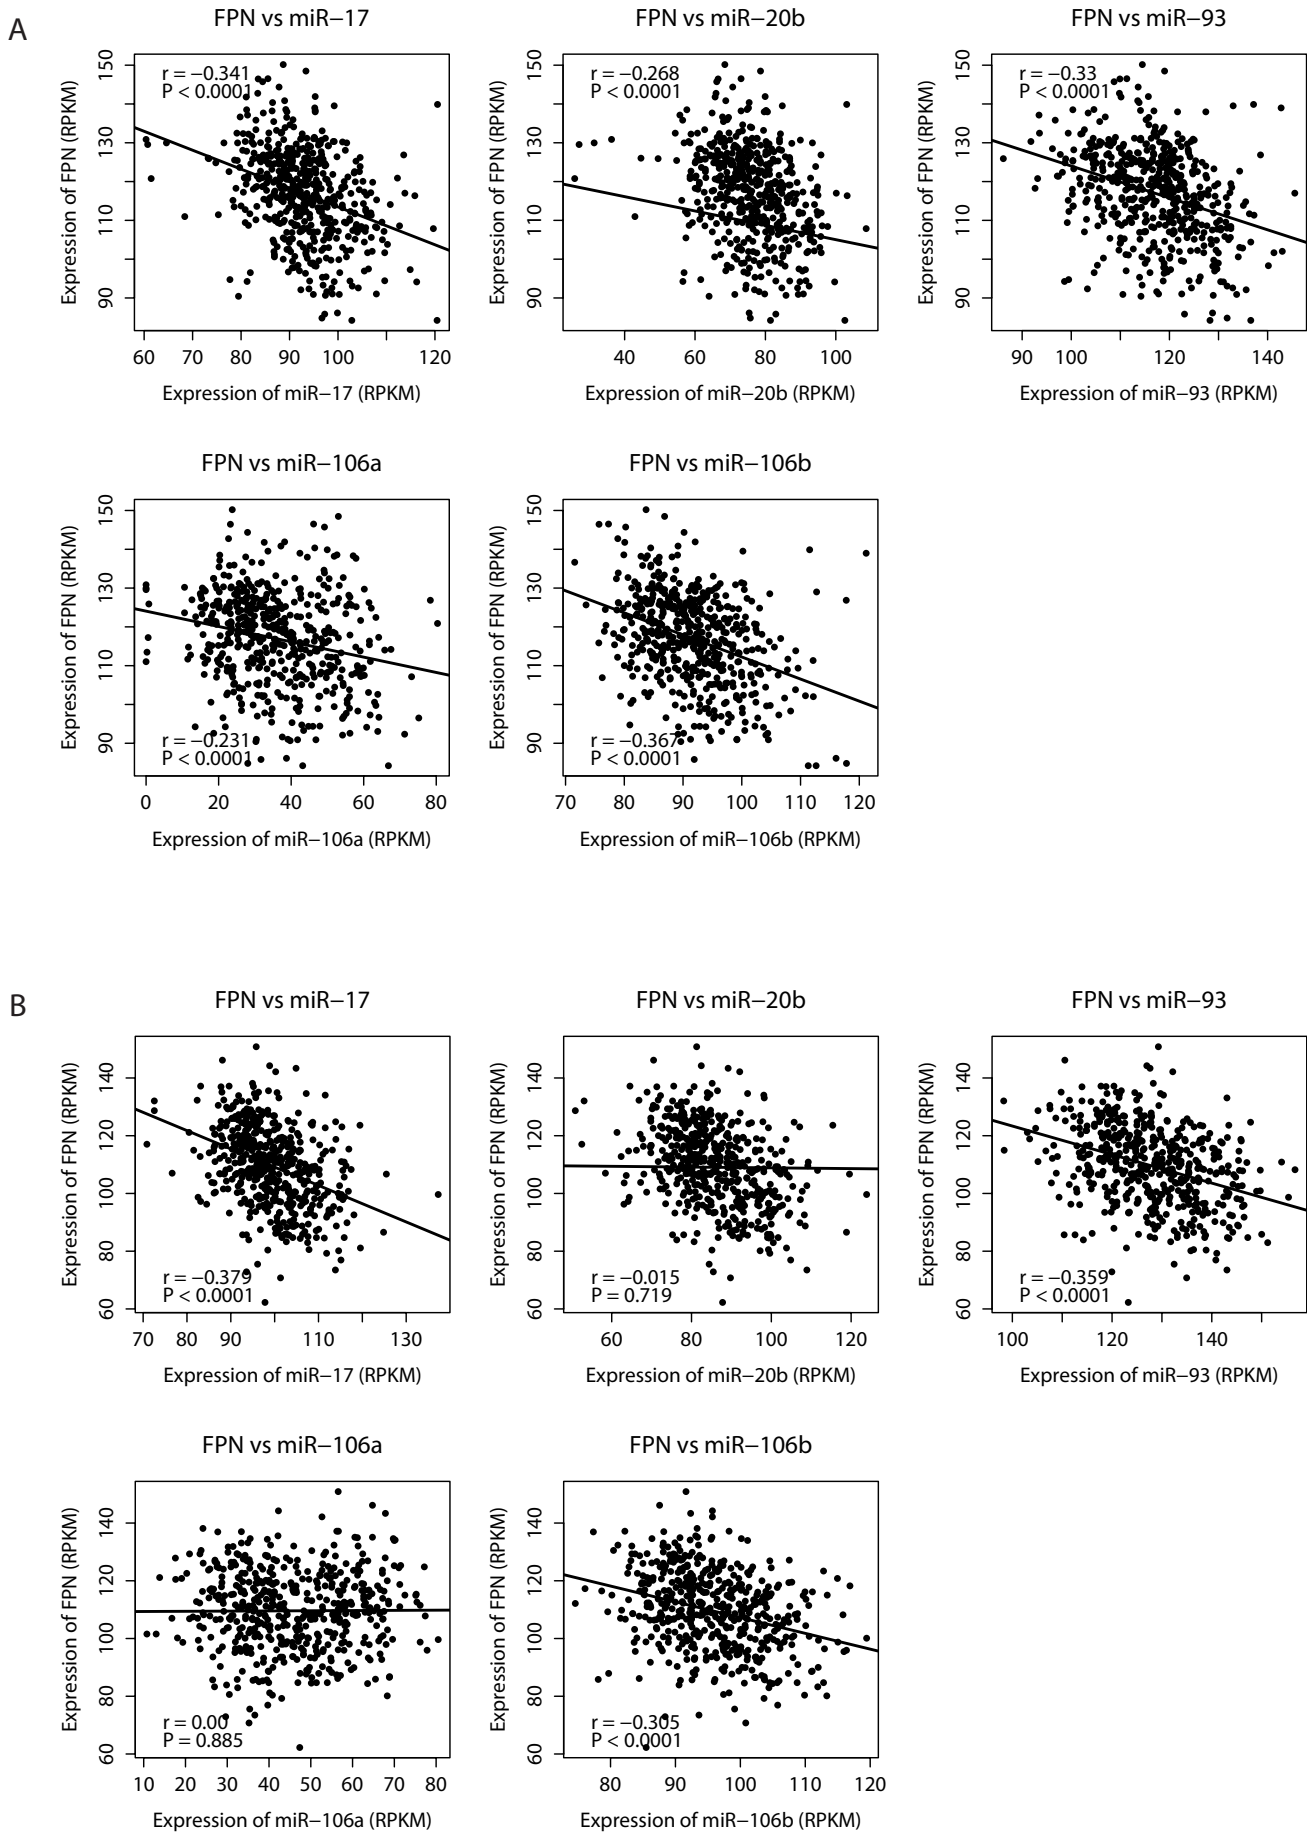

Figure S3. Scatter plots indicating correlations of FPN mRNA levels to the indicated member of the miR-17 seed family within TCGA datasets of (A) lung adenocarcinoma (LUAD) and (B) lung squamous cell carcinoma (LUSC) patients. Pearson's product moment correlation was used to calculate statistical significance.

Figure S4

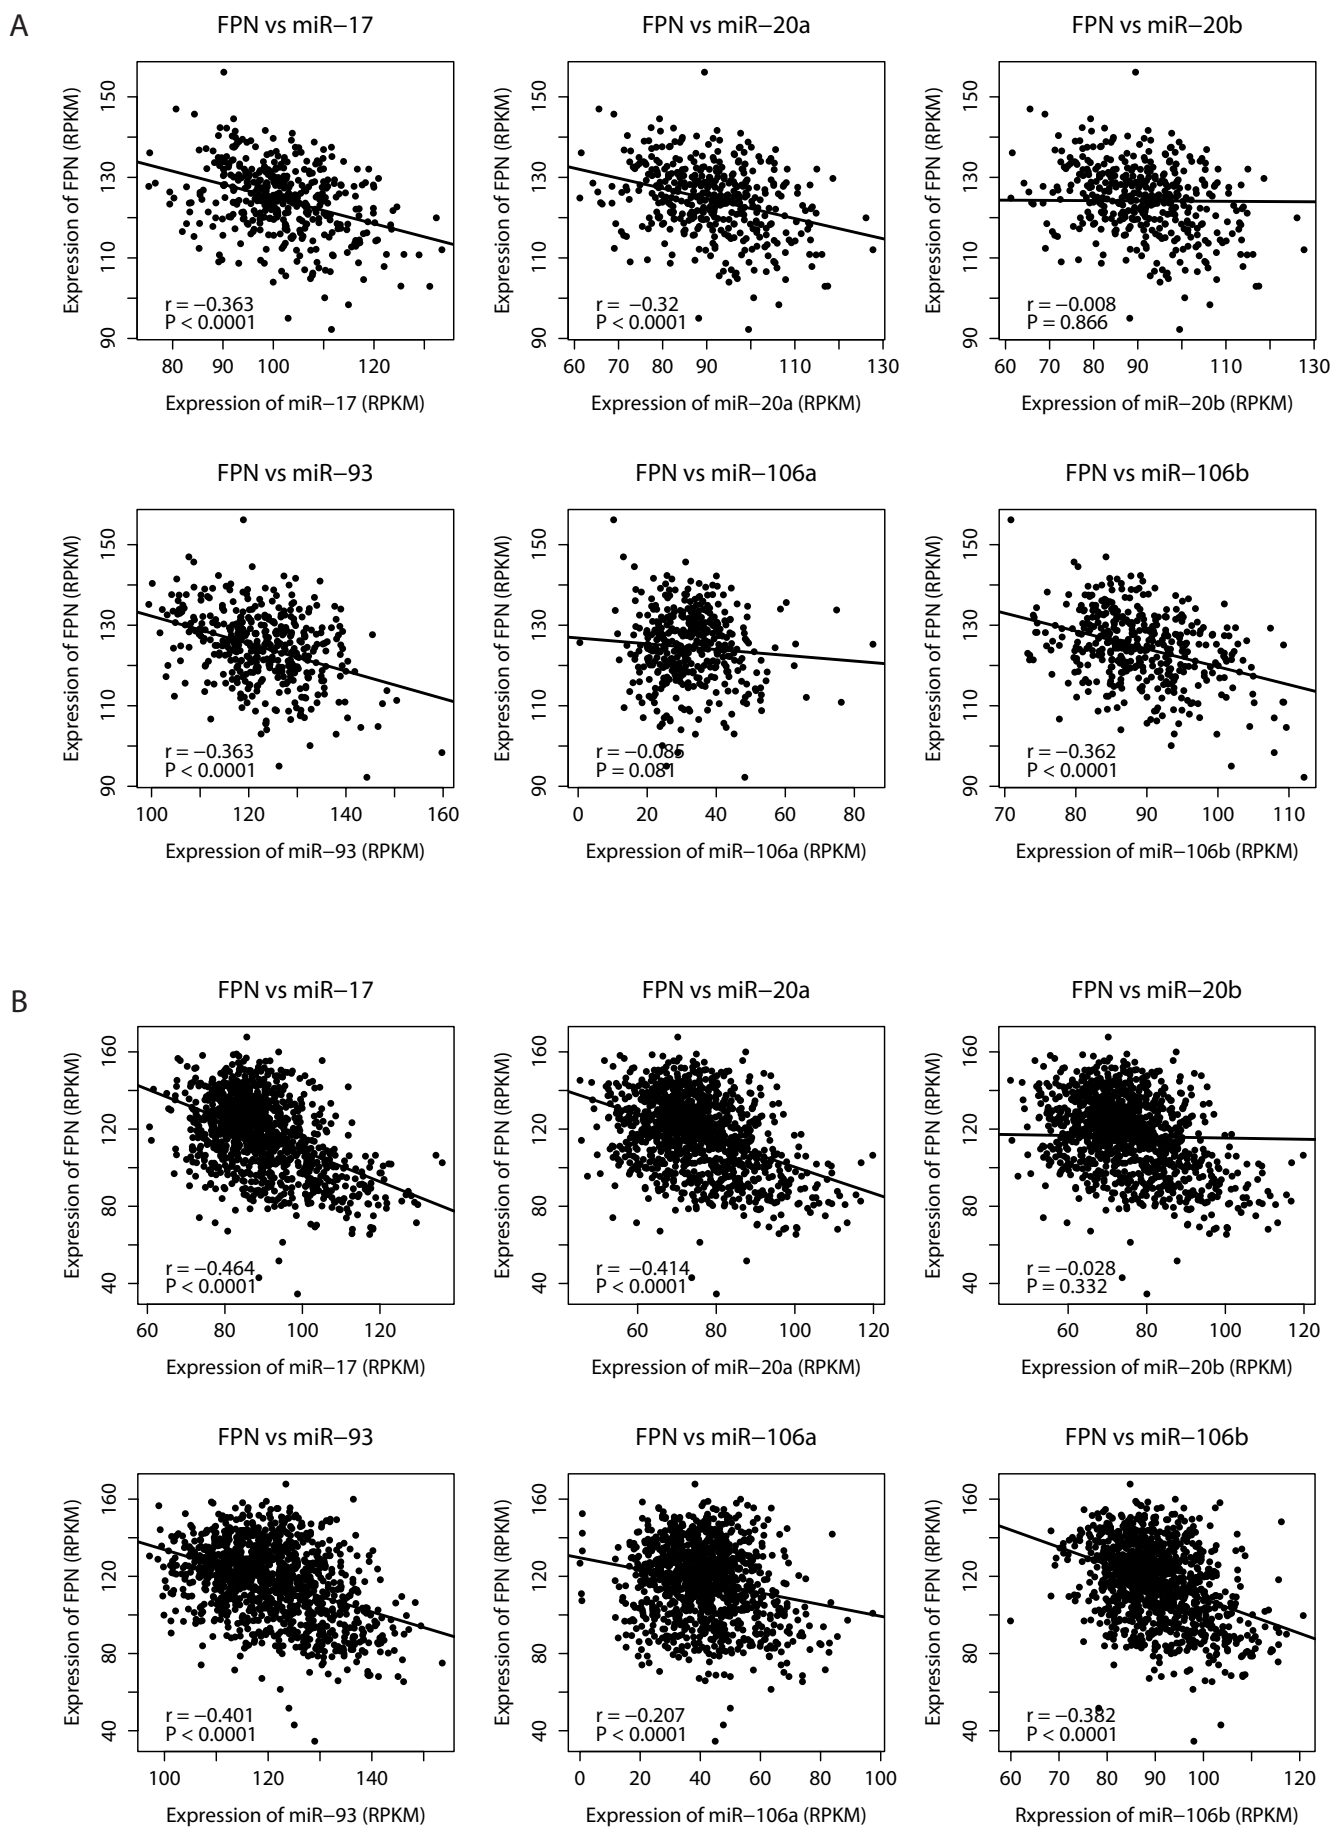

Figure S4. Scatter plots indicating correlation of FPN mRNA levels to the indicated member of the miR-17 seed family within TCGA datasets of (A) hepatocellular carcinoma (LIHC) and (B) breast cancer (BRCA) patients. Pearson's product moment correlation was used to calculate statistical significance.



Figure S5

A

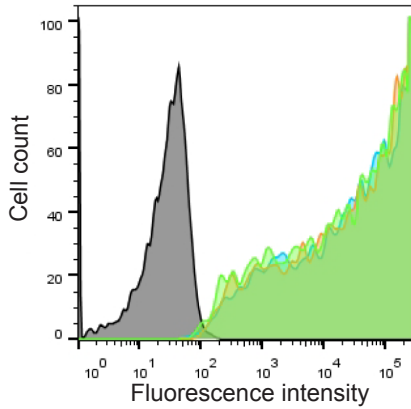

| Sample Name              | Subset Name | Count |
|--------------------------|-------------|-------|
| H1299_24h GFP3_004.fcs   | H1299       | 5206  |
| H1299_24h GFP2_003.fcs   | H1299       | 5125  |
| H1299_24h GFP1_002.fcs   | H1299       | 5440  |
| H1299_24h control_001.fc | H1299       | 10661 |

B

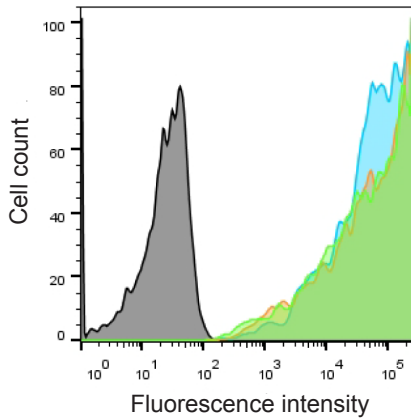

| Sample Name              | Subset Name | Count |
|--------------------------|-------------|-------|
| H1299_48h GFP3_008.fcs   | H1299       | 5397  |
| H1299_48h GFP2_007.fcs   | H1299       | 5367  |
| H1299_48h GFP1_006.fcs   | H1299       | 5226  |
| H1299_48h control_005.fc | H1299       | 5556  |

C

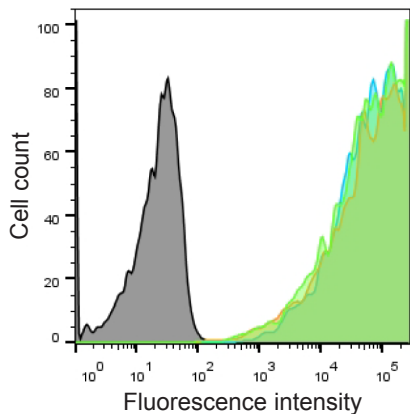

| Sample Name              | Subset Name | Count |
|--------------------------|-------------|-------|
| H1299_72h GFP3_012.fcs   | H1299       | 5134  |
| H1299_72h GFP2_011.fcs   | H1299       | 5170  |
| H1299_72h GFP1_010.fcs   | H1299       | 5217  |
| H1299_72h control_009.fc | H1299       | 5142  |

Figure S5. Chromatograms illustrating the transfection efficiency of the FPN expression construct (pcDNA FPN-EGFP) into H1299 cells. Green fluorescence intensity was analyzed by flow cytometry following transient transfection of pcDNA FPN-EGFP into H1299 cells after (A) 24 hrs (B) 48 hrs and (C) 72 hrs.

Figure S6

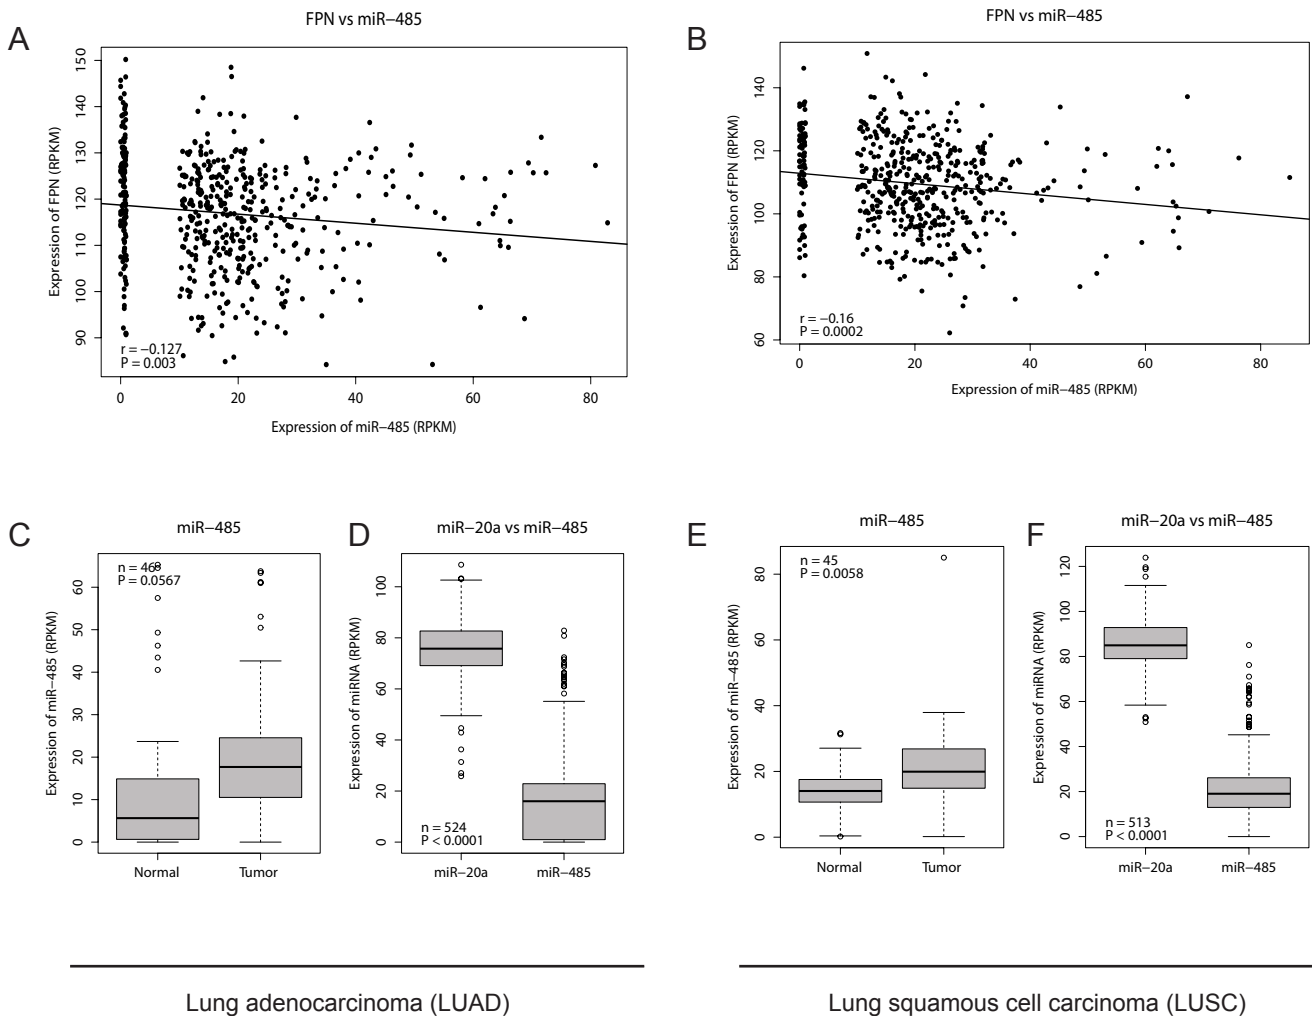

Figure S6. TCGA RNA-sequencing datasets available from Lung adenocarcinoma (LUAD) and Lung squamous cell carcinoma (LUSC) patients were downloaded from the UCSC cancer genomic browser (<https://genome-cancer.ucsc.edu>). Correlations between miR-485 and FPN mRNA expression levels are represented as scatter plots for (A) LUAD ( $n = 524$ ,  $r = -0.127$ ,  $P = 0.003$ ) and (B) LUSC ( $n = 513$ ,  $r = -0.16$ ,  $P = 0.0002$ ). Pearson's product moment correlation was used to calculate statistical significance. Boxplots illustrate that in patients with LUAD (C) miR-485 expression is not significantly elevated ( $n = 46$ ,  $P = 0.0567$ ) and that (D) miR-485 expression is significantly lower ( $n = 524$ ,  $P < 0.0001$ ) compared to miR-20a expression. In patients with LUSC (E) miR-485 is significantly increased compared to normal ( $n = 45$ ,  $P = 0.0058$ ) and (F) miR-485 expression is significantly lower ( $n = 513$ ,  $P < 0.0001$ ) compare to miR-20a levels. 2-tailed Student's t test was used to calculate statistical significance. RPKM = Reads Per Kilobaseper Million mapped reads.

Figure S7

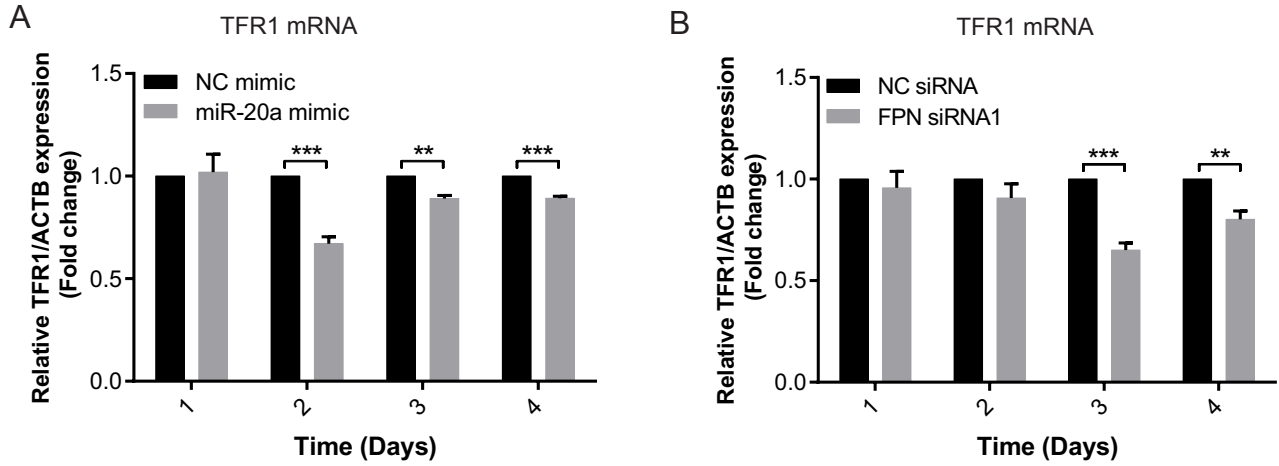

Figure S7. H1650 cells were transfected with 50 nM of (A) miR-20a mimic or (B) FPN siRNA1. After transfection TFR1 mRNA levels were analyzed by quantitative RT-PCR at an interval of 24 hrs for up to 4 days. Experiments were performed in triplicates and repeated at least three times. Data were normalized to ACTB. Data are represented as mean  $\pm$  SEM, and the values from negative control (NC) mimic were set to 1,  $**P < 0.001$ ,  $***P < 0.001$ , 2-tailed Student's t test was used to calculate statistical significance.

Figure S8

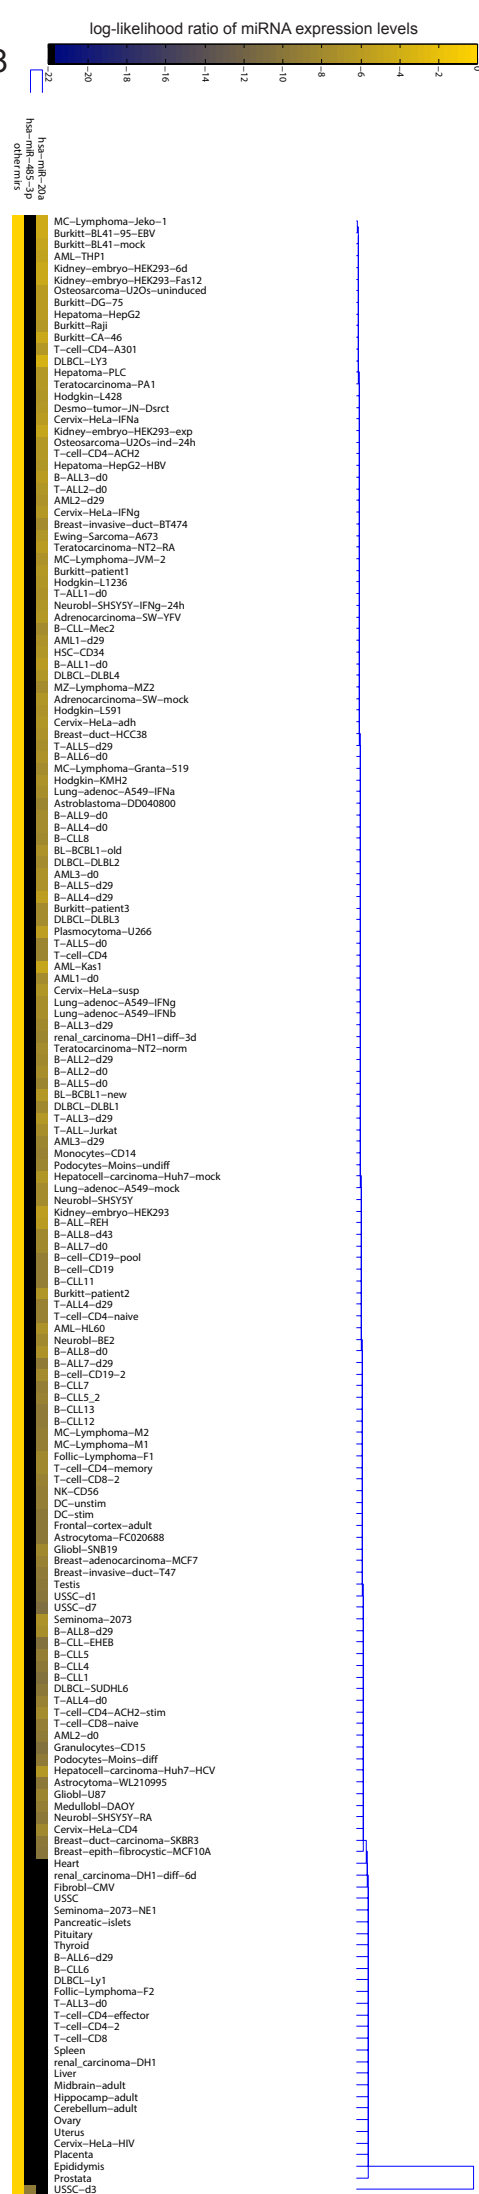

Figure S8. Heatmap illustrating comparative expression levels of miR-20a and miR-485-3p in various human tissues and cell lines.
